# Supplementary material for: Quality of life in patients with severe mental illness: a cross-sectional survey in an integrated outpatient health care model
Source: Springer Nature journal article supplement (doi:10.1007/s11136-020-02470-0), 2020-03-13
Supplement: MOESM1 [file 17798714]

## Supplementary Material

**Table S1 Quality of life (WHOQOL-BREF) overall and stratified by diagnostic group (means with 95%-confidence intervals (CI))**

|                                                                                | WHOQOL-BREF         |                     |                     |                     |                     |
|--------------------------------------------------------------------------------|---------------------|---------------------|---------------------|---------------------|---------------------|
|                                                                                | Global scale        | Domains             |                     |                     |                     |
|                                                                                |                     | Physical            | Psychological       | Social              | Environmental       |
| <b>Overall</b> ( <i>n</i> =953 for subdomains, <i>n</i> =941 for global scale) | 34.1<br>[32.8-35.5] | 41.7<br>[40.8-42.6] | 39.9<br>[40.9-38.9] | 43.6<br>[42.1-45.1] | 55.3<br>[54.3-56.3] |
| <b>Unipolar depression</b><br>( <i>n</i> =554)                                 | 30.5<br>[28.9-32.2] | 39.1<br>[38.0-40.2] | 36.8<br>[35.5-38.1] | 41.4<br>[39.4-43.3] | 54.3<br>[53.0-55.5] |
| <b>Bipolar depression</b><br>( <i>n</i> =48)                                   | 37.5<br>[31.9-43.1] | 45.6<br>[41.7-49.5] | 43.6<br>[38.9-48.3] | 42.9<br>[36.0-49.9] | 57.0<br>[52.9-61.2] |
| <b>Schizophrenia</b><br>( <i>n</i> =131)                                       | 42.5<br>[39.1-45.9] | 47.0<br>[44.8-49.2] | 46.3<br>[43.9-48.7] | 45.6<br>[41.9-49.3] | 55.6<br>[52.8-58.3] |
| <b>Schizoaffective disorder</b><br>( <i>n</i> =45)                             | 39.6<br>[33.6-45.6] | 44.2<br>[40.3-48.1] | 43.9<br>[38.9-48.8] | 47.2<br>[40.7-53.7] | 57.9<br>[52.9-62.8] |
| <b>Neurotic disorder</b> ( <i>n</i> =109)                                      | 28.7<br>[24.9-32.5] | 43.1<br>[40.3-45.9] | 39.9<br>[36.8-43.0] | 43.7<br>[39.2-48.2] | 54.7<br>[51.5-57.9] |
| <b>Dementia</b> ( <i>n</i> =50)                                                | 53.0<br>[47.5-58.5] | 47.8<br>[43.0-52.6] | 49.8<br>[44.3-55.3] | 59.2<br>[52.8-65.5] | 63.1<br>[58.1-68.1] |
| <b>Alcohol addiction</b><br>( <i>n</i> =15)                                    | 43.3<br>[33.3-53.4] | 43.1<br>[37.4-48.9] | 43.7<br>[40.8-46.6] | 48.6<br>[37.9-59.3] | 55.6<br>[47.2-64.1] |
